# Supplementary material
Source: publisher figshare collection journal article supplement (https://acs.figshare.com/ndownloader/files/12302681)
Supplement: Supplementary file 1 [file 12302681]

**Supporting information for:**

**Site-Specific Doping of  $\text{Mn}^{2+}$  in a CdS-based Molecular Cluster**

Fumitoshi Kato and Kevin R. Kittilstved\*

Department of Chemistry, University of Massachusetts Amherst, 374 Lederle GRT, 710 North Pleasant Street,  
Amherst, Massachusetts 01003, United States

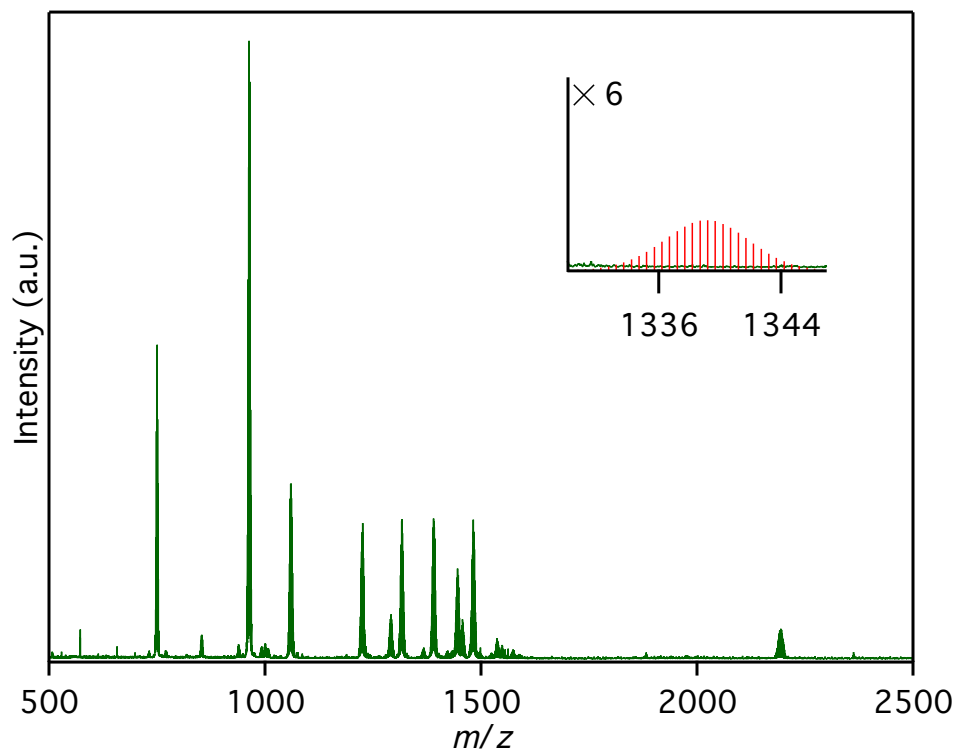

**Figure S1.** Negative ion mode ESI-MS of undoped  $\text{Cd}_{10}$  dissolved in  $\text{CH}_3\text{CN}$  collected at a cone voltage of  $-40\text{V}$ . The inset shows an overlay of the collected mass spectrum (green) and simulated  $[\text{Cd}_8\text{S}(\text{SPh})_{16}]^{2-}$  peak (red).

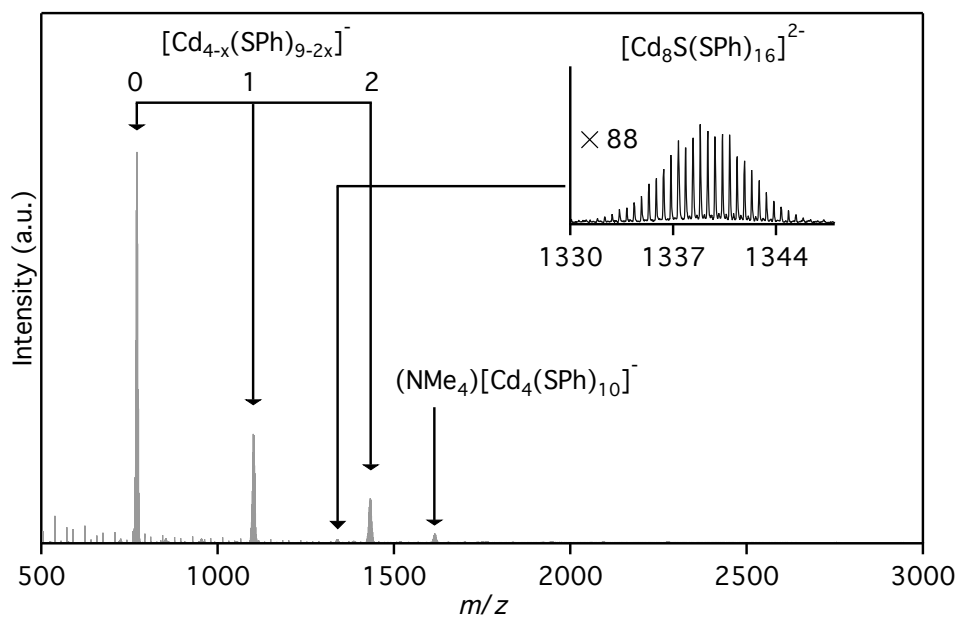

**Figure S2.** Negative-ion mode ESI-MS of the supernatant isolated after the synthesis of pure  $\text{Cd}_{10}$  was collected at a cone voltage of  $-40\text{V}$ . The dominant species detected by MS were the singly charged ions derived from  $\text{Cd}_4$ . The numerical values shown in the graph corresponds to 'x' in  $[\text{Cd}_{4-x}(\text{SPh})_{9-2x}]^-$ . No peaks corresponding to fragments from  $\text{Cd}_{10}$  were observed.

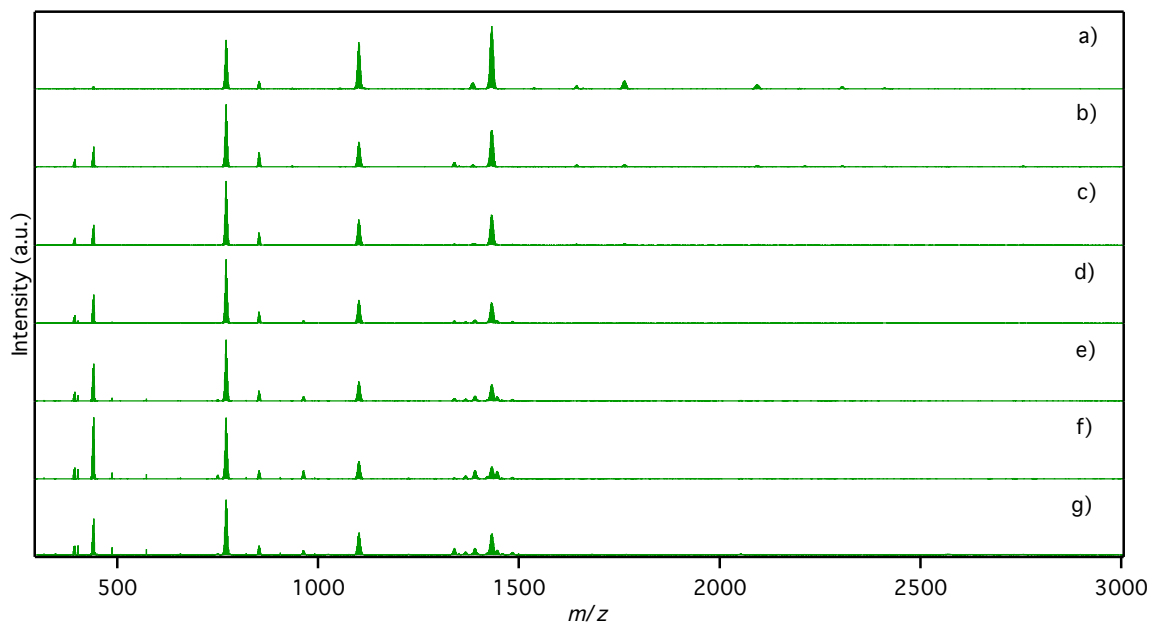

**Figure S3.** Negative-ion mode ESI-MS of the aliquots collected during the synthesis of undoped cluster. All the spectra were collected at a cone voltage of  $-20\text{V}$ . Mass spectra were collected after 2.14 mmol of  $\text{Cd}(\text{NO}_3)_2$  (a), 240  $\mu\text{mol}$  of  $\text{Na}_2\text{S}$  (b), 480  $\mu\text{mol}$  of  $\text{Na}_2\text{S}$  (c), 720  $\mu\text{mol}$  of  $\text{Na}_2\text{S}$  (d), 960  $\mu\text{mol}$  of  $\text{Na}_2\text{S}$  (e), 1.20 mmol of  $\text{Na}_2\text{S}$  (f), and another 405  $\mu\text{mol}$  of  $\text{Cd}(\text{NO}_3)_2$  (g) was added a solution of 5.20 mmol of  $\text{SPh}^-$ .

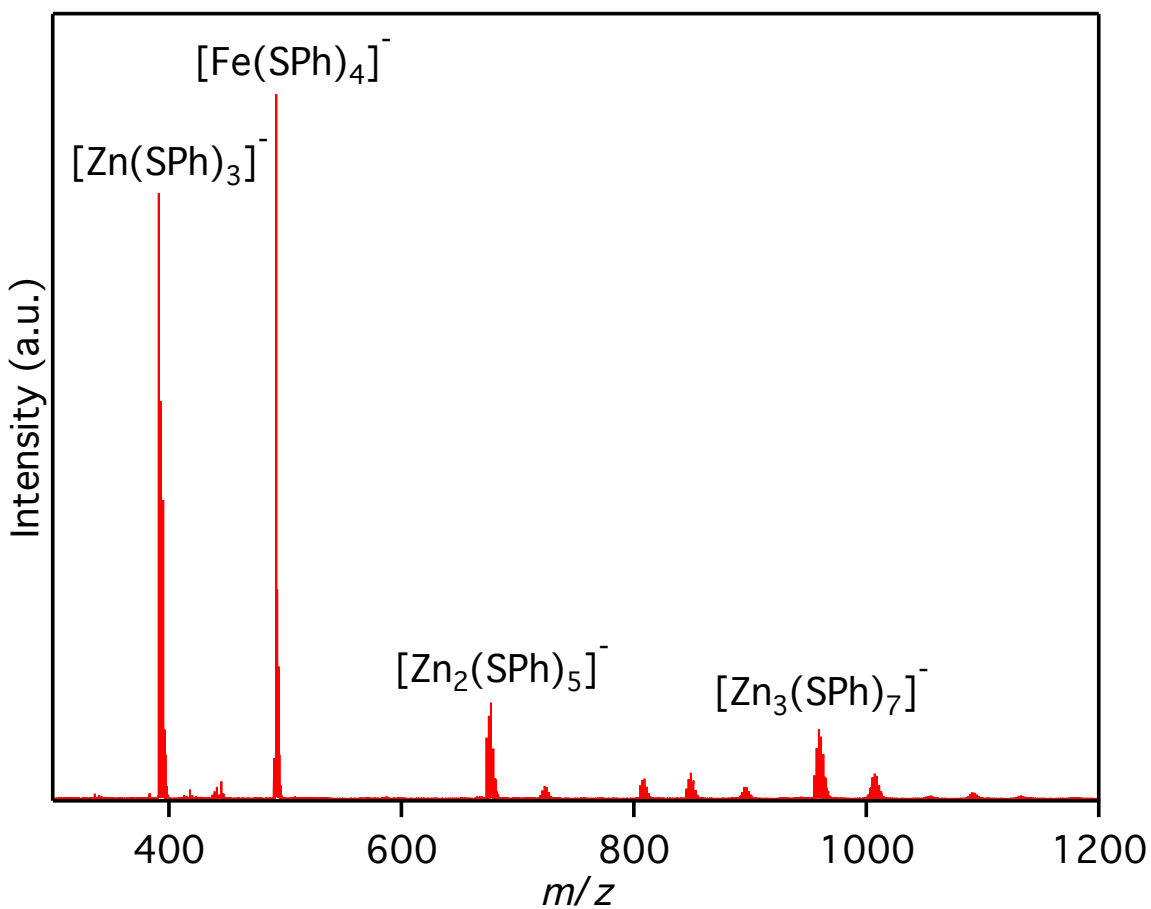

**Figure S4.** ESI-MS of thiophenol collected at  $-40\text{V}$  in  $\text{CH}_3\text{CN}$ . The ESI-MS exhibits a significant fraction of  $\text{Zn}^{2+}$  and  $\text{Fe}^{3+}$  contamination in the as-purchased bottle.

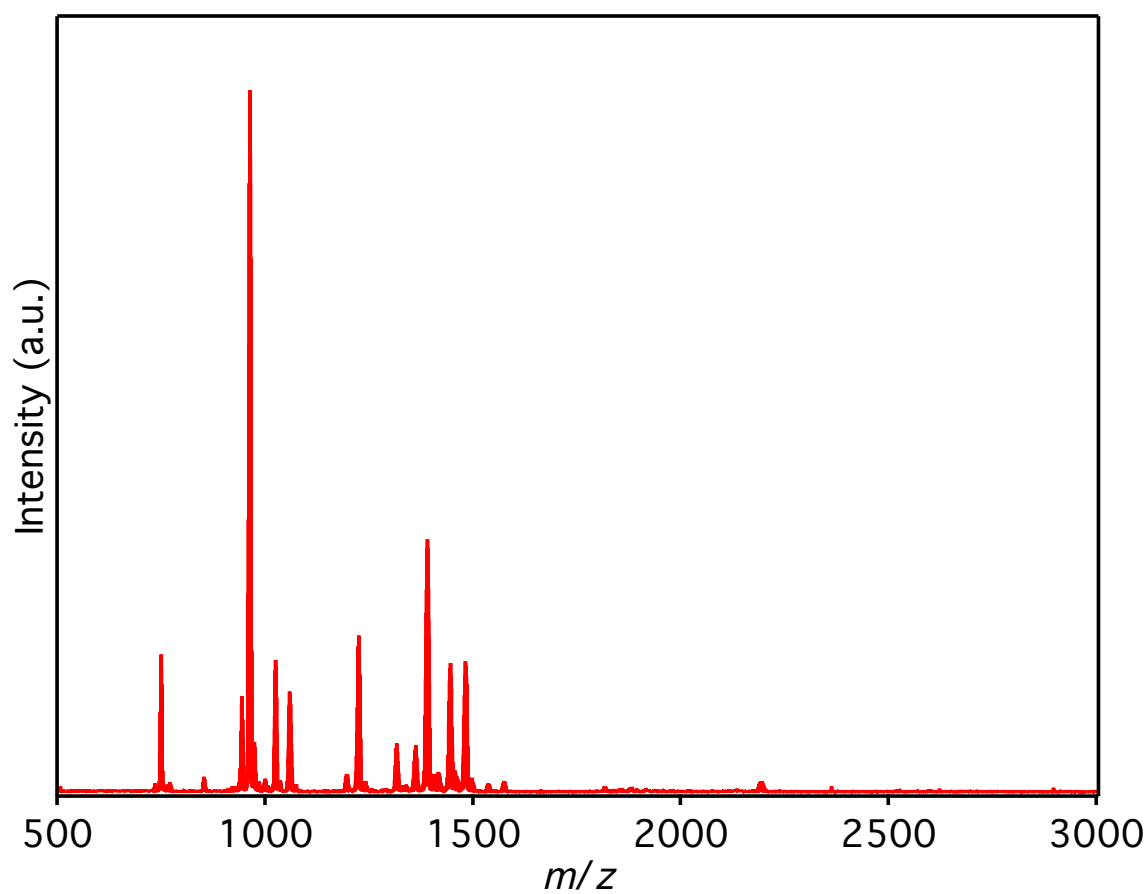

**Figure S5.** Mass spectrum of cluster prepared from **Mn:Cd<sub>10</sub>-1**. The sample was dissolved in degassed acetonitrile and the spectrum was collected at a cone voltage of  $-40\text{V}$ .

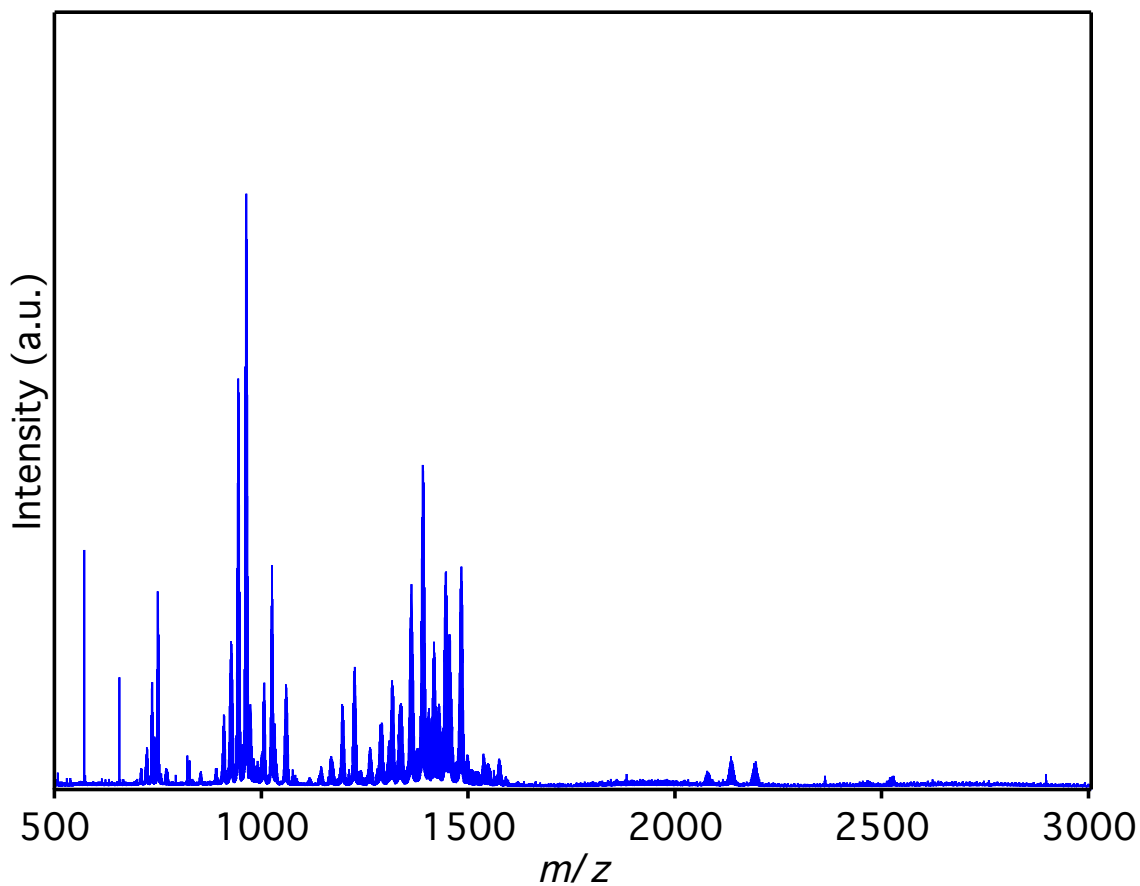

**Figure S6.** Mass spectrum of cluster prepared from **Mn:Cd<sub>10</sub>-2**. The sample was dissolved in degassed acetonitrile and the spectrum was collected at a cone voltage of -40V.

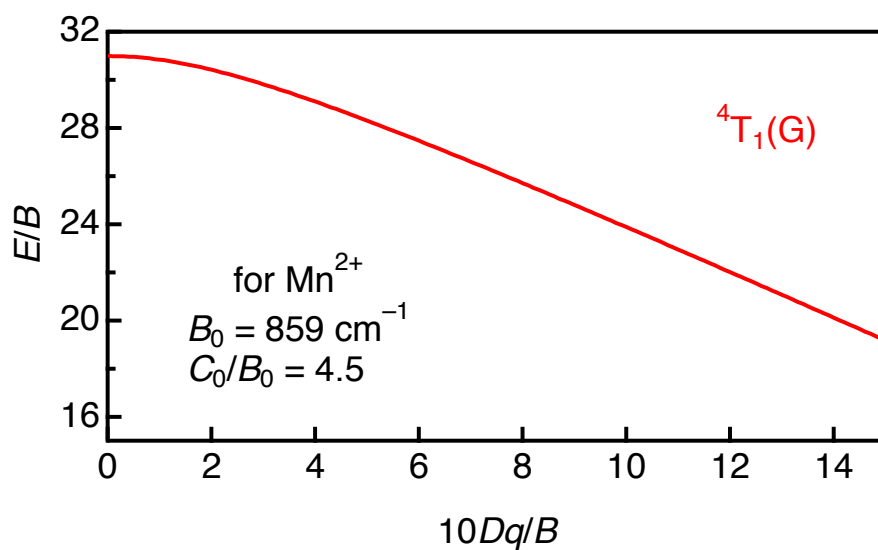

**Figure S7.** Expanded view of the lowest  ${}^4T_1$  excited state energy (relative to the ground state) vs ligand field strength ( $10Dq/B$ ) for a  $d^5$  ion in a cubic field. The energies of the ground state and excited state was calculated using the Tanabe-Sugano energy matrices (see: Y. Tanabe, S. Sugano, On the Absorption Spectra of Complex Ions. I. *J. Phys. Soc.-Jpn* **1954**, 9, 753-766).

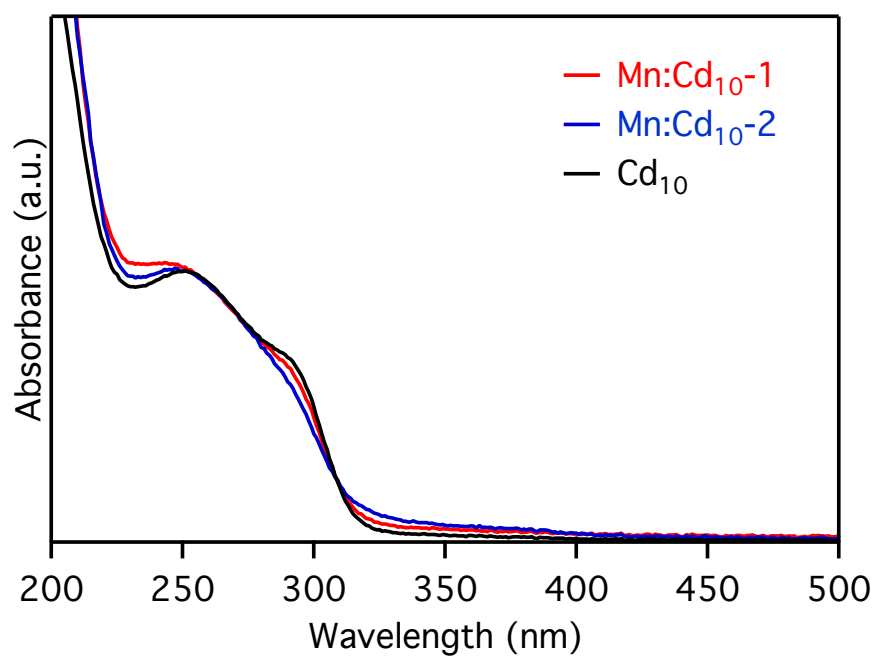

**Figure S8.** Room-temperature UV-Vis absorption spectra of the synthesized clusters dissolved in degassed acetonitrile.

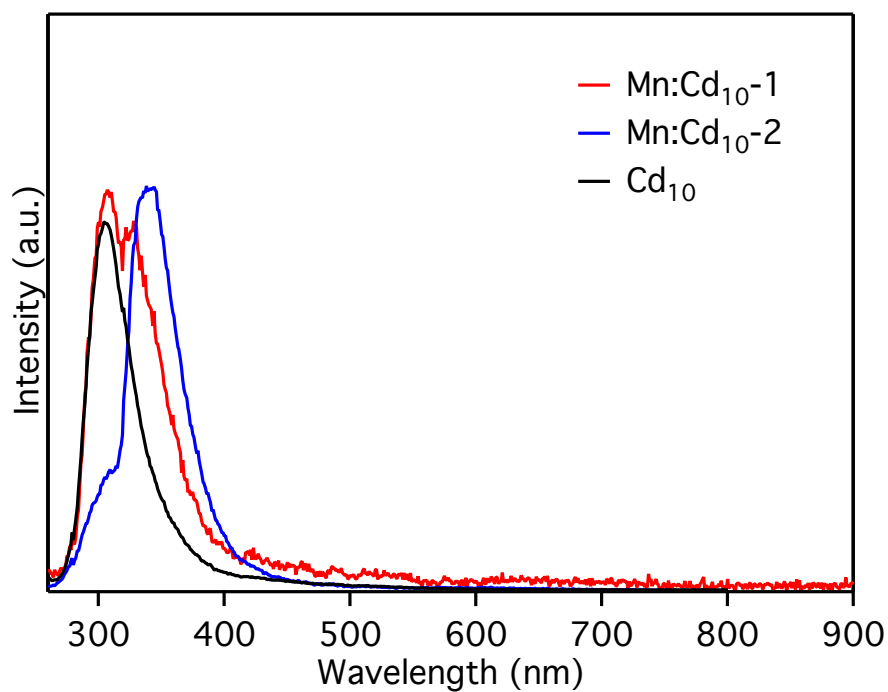

**Figure S9.** Room-temperature, steady-state PL spectra of the synthesized clusters dissolved in degassed acetonitrile. Samples were excited at 230 nm.

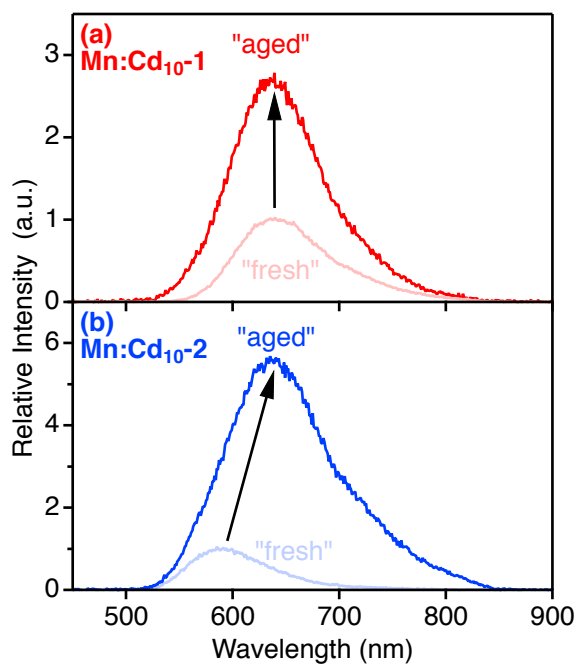

**Figure S10.** Room-temperature gated PL spectra of the **Mn:Cd<sub>10-1</sub>** clusters collected immediately after the cluster was dissolved in degassed acetonitrile (red) and two hours later (yellow).

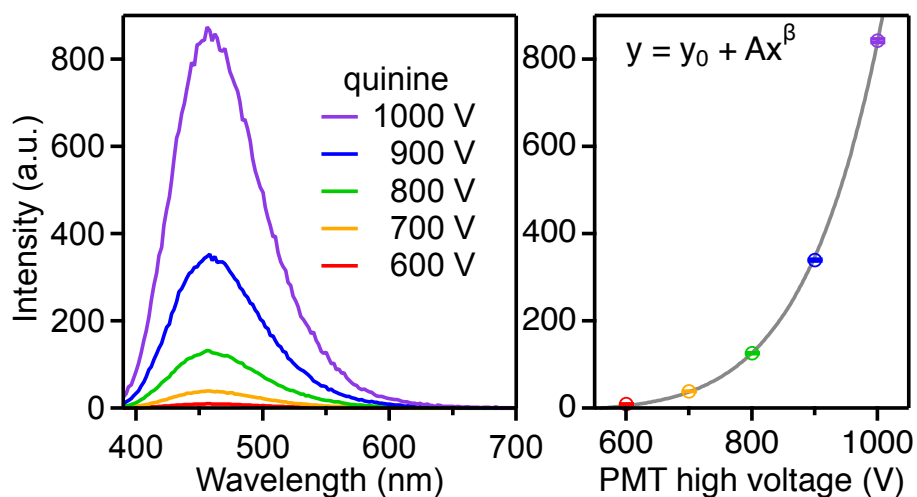

**Figure S11.** (Left panel) Steady-state PL spectra of a quinine sulfate dihydrate solution as a function of detector sensitivity (PMT high voltage). (Right panel) The intensity follows a power law dependence (gray line is the fit to the equation)  $\sim 6.7\times$  enhancement in signal intensity upon increasing the PMT HV from 800 V to 1000 V. This scaling factor has been accounted for when normalizing the spectrum of the fresh Mn:Cd<sub>10-2</sub> shown in Figure 5 of the manuscript.

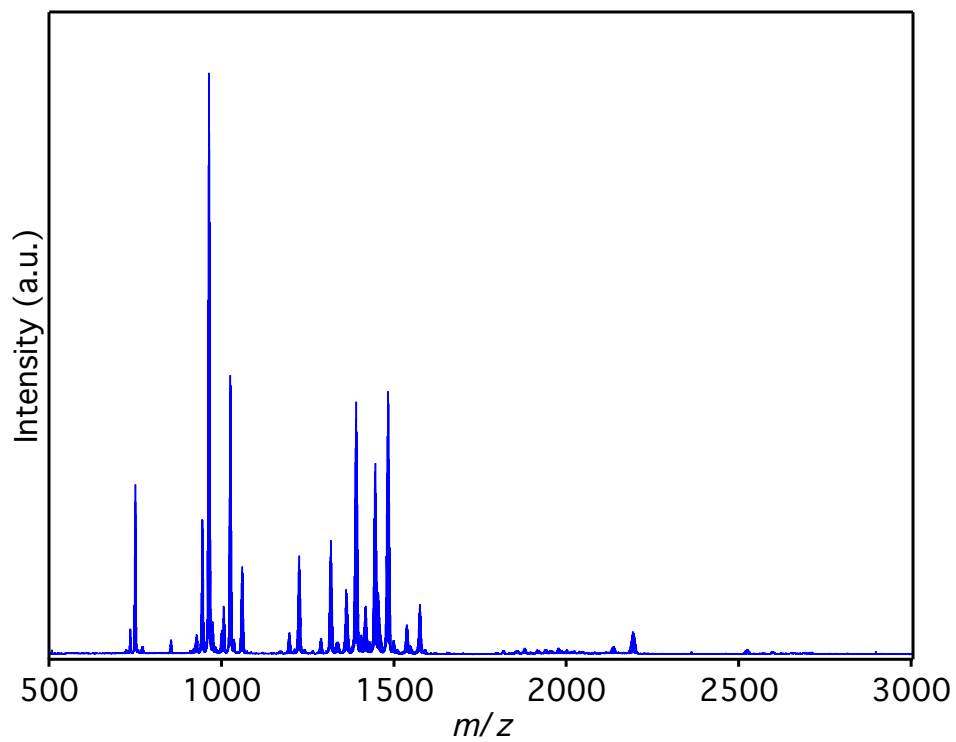

**Figure S12.** ESI mass spectrum of cluster prepared from **Mn:Cd<sub>10</sub>-2**. The sample was dissolved in degassed acetonitrile for two hours before the spectrum was collected at a cone voltage of  $-40\text{V}$ .



**Table S1.** Anionic species observed in the mass spectra of clusters prepared by **Mn:Cd<sub>10</sub>-1** or **Mn:Cd<sub>10</sub>-2**. The cone voltage was set to -40V.

| Fragments                                                                                                            | <i>m/z</i> (calc.) | <i>m/z</i> (exp.) |
|----------------------------------------------------------------------------------------------------------------------|--------------------|-------------------|
| [NC <sub>4</sub> H <sub>12</sub> ][Cd <sub>8</sub> S <sub>4</sub> (SPh) <sub>10</sub> ] <sup>-</sup>                 | 2193               | 2193              |
| [NC <sub>4</sub> H <sub>12</sub> ][Cd <sub>7</sub> MnS <sub>4</sub> (SPh) <sub>10</sub> ] <sup>-</sup>               | 2136               | 2136              |
| [NC <sub>4</sub> H <sub>12</sub> ][Cd <sub>6</sub> Mn <sub>2</sub> S <sub>4</sub> (SPh) <sub>10</sub> ] <sup>-</sup> | 2078               | 2078              |
| [Cd <sub>10</sub> S <sub>3</sub> (SPh) <sub>16</sub> ] <sup>3-</sup>                                                 | 1484               | 1484              |
| [Cd <sub>9</sub> MnS <sub>3</sub> (SPh) <sub>16</sub> ] <sup>3-</sup>                                                | 1455               | 1455              |
| [Cd <sub>10</sub> S <sub>4</sub> (SPh) <sub>15</sub> + H <sup>+</sup> ] <sup>2-</sup>                                | 1446               | 1446              |
| [Cd <sub>9</sub> MnS <sub>4</sub> (SPh) <sub>15</sub> + H <sup>+</sup> ] <sup>2-</sup>                               | 1417               | 1417              |
| [Cd <sub>10</sub> S <sub>4</sub> (SPh) <sub>14</sub> ] <sup>2-</sup>                                                 | 1390               | 1390              |
| [Cd <sub>9</sub> MnS <sub>4</sub> (SPh) <sub>14</sub> ] <sup>2-</sup>                                                | 1362               | 1362              |
| [Cd <sub>8</sub> Mn <sub>2</sub> S <sub>4</sub> (SPh) <sub>14</sub> ] <sup>2-</sup>                                  | 1333               | 1333              |
| [Cd <sub>7</sub> Mn <sub>3</sub> S <sub>4</sub> (SPh) <sub>14</sub> ] <sup>2-</sup>                                  | 1304               | 1304              |
| [Cd <sub>8</sub> S(SPh) <sub>16</sub> ] <sup>2-</sup>                                                                | 1339               | 1339              |
| [Cd <sub>7</sub> MnS(SPh) <sub>16</sub> ] <sup>2-</sup>                                                              | 1310               | 1310              |
| [Cd <sub>6</sub> Mn <sub>2</sub> S(SPh) <sub>16</sub> ] <sup>2-</sup>                                                | 1282               | 1282              |
| [Cd <sub>7</sub> S(SPh) <sub>14</sub> ] <sup>2-</sup>                                                                | 1174               | 1174              |
| [Cd <sub>6</sub> MnS(SPh) <sub>14</sub> ] <sup>2-</sup>                                                              | 1145               | 1145              |
| [Cd <sub>5</sub> Mn <sub>2</sub> S(SPh) <sub>14</sub> ] <sup>2-</sup>                                                | 1117               | 1117              |
| [NC <sub>4</sub> H <sub>12</sub> ][Cd <sub>9</sub> S <sub>4</sub> (SPh) <sub>13</sub> ] <sup>2-</sup>                | 1317               | 1317              |
| [NC <sub>4</sub> H <sub>12</sub> ][Cd <sub>8</sub> MnS <sub>4</sub> (SPh) <sub>13</sub> ] <sup>2-</sup>              | 1288               | 1288              |
| [Cd <sub>9</sub> S <sub>4</sub> (SPh) <sub>12</sub> ] <sup>2-</sup>                                                  | 1225               | 1225              |
| [Cd <sub>8</sub> MnS <sub>4</sub> (SPh) <sub>12</sub> ] <sup>2-</sup>                                                | 1196               | 1196              |
| [Cd <sub>7</sub> Mn <sub>2</sub> S <sub>4</sub> (SPh) <sub>12</sub> ] <sup>2-</sup>                                  | 1168               | 1168              |
| [Cd <sub>6</sub> Mn <sub>3</sub> S <sub>4</sub> (SPh) <sub>12</sub> ] <sup>2-</sup>                                  | 1139               | 1139              |
| [Cd <sub>7</sub> S(SPh) <sub>14</sub> ] <sup>2-</sup>                                                                | 1174               | 1174              |
| [Cd <sub>6</sub> MnS(SPh) <sub>14</sub> ] <sup>2-</sup>                                                              | 1145               | 1145              |
| [Cd <sub>8</sub> S <sub>4</sub> (SPh) <sub>10</sub> ] <sup>2-</sup>                                                  | 1060               | 1060              |
| [Cd <sub>7</sub> MnS(SPh) <sub>10</sub> ] <sup>2-</sup>                                                              | 1031               | 1031              |
| [Cd <sub>10</sub> S <sub>3</sub> (SPh) <sub>17</sub> ] <sup>2-</sup>                                                 | 1025               | 1025              |
| [Cd <sub>9</sub> MnS <sub>3</sub> (SPh) <sub>17</sub> ] <sup>2-</sup>                                                | 1006               | 1006              |
| [Cd <sub>10</sub> S <sub>4</sub> (SPh) <sub>15</sub> ] <sup>3-</sup>                                                 | 963                | 963               |
| [Cd <sub>9</sub> MnS <sub>4</sub> (SPh) <sub>15</sub> ] <sup>3-</sup>                                                | 944                | 944               |
| [Cd <sub>8</sub> Mn <sub>2</sub> S <sub>4</sub> (SPh) <sub>15</sub> ] <sup>3-</sup>                                  | 925                | 925               |
| [Cd <sub>7</sub> Mn <sub>3</sub> S <sub>4</sub> (SPh) <sub>15</sub> ] <sup>3-</sup>                                  | 906                | 906               |
| [Cd <sub>8</sub> S(SPh) <sub>17</sub> ] <sup>3-</sup>                                                                | 929                | 929               |
| [Cd <sub>7</sub> MnS(SPh) <sub>17</sub> ] <sup>3-</sup>                                                              | 910                | 910               |
| [Cd <sub>6</sub> Mn <sub>2</sub> S(SPh) <sub>17</sub> ] <sup>3-</sup>                                                | 891                | 891               |
| [Cd <sub>10</sub> S <sub>4</sub> (SPh) <sub>16</sub> ] <sup>4-</sup>                                                 | 750                | 750               |
| [Cd <sub>9</sub> MnS <sub>4</sub> (SPh) <sub>16</sub> ] <sup>4-</sup>                                                | 735                | 735               |
| [Cd <sub>8</sub> Mn <sub>2</sub> S <sub>4</sub> (SPh) <sub>16</sub> ] <sup>4-</sup>                                  | 721                | 721               |
| [Cd <sub>7</sub> Mn <sub>3</sub> S <sub>4</sub> (SPh) <sub>16</sub> ] <sup>4-</sup>                                  | 707                | 707               |
| [Cd <sub>8</sub> S(SPh) <sub>18</sub> ] <sup>4-</sup>                                                                | 724                | 724               |
| [Cd <sub>7</sub> MnS(SPh) <sub>18</sub> ] <sup>4-</sup>                                                              | 710                | 710               |
| [Cd <sub>6</sub> Mn <sub>2</sub> S(SPh) <sub>18</sub> ] <sup>4-</sup>                                                | 695                | 695               |

**Table S2.** Comparison of measured Mn and Zn contents for clusters prepared by method 1 and 2.

| Elements | <b>Mn:Cd<sub>10</sub>-1</b> | <b>Mn:Cd<sub>10</sub>-2</b> |
|----------|-----------------------------|-----------------------------|
| Mn       | 20.7%                       | 20.1%                       |
| Zn       | 0%                          | 0%                          |

**Table S3.** Results from the double-exponential fit of the PL decay shown in Figure 4b using eq 1. Units are given next to the parameter.

| Parameters                  | <b>Mn:Cd<sub>10</sub>-1</b> | <b>Mn:Cd<sub>10</sub>-2</b> |
|-----------------------------|-----------------------------|-----------------------------|
| $\alpha_1$ (a.u.)           | $0.090 \pm 0.002$           | $0.378 \pm 0.045$           |
| $\tau_1$ (ms)               | $0.120 \pm 0.002$           | $0.551 \pm 0.039$           |
| $\alpha_2$ (a.u.)           | $0.216 \pm 0.002$           | $1.169 \pm 0.082$           |
| $\tau_2$ (ms)               | $0.880 \pm 0.016$           | $3.141 \pm 0.426$           |
| $\langle \tau \rangle$ (ms) | 0.66                        | 2.5                         |
